# Supplementary material
Source: MDPI journal article supplement (https://www.mdpi.com/2414-4088/4/4/69)

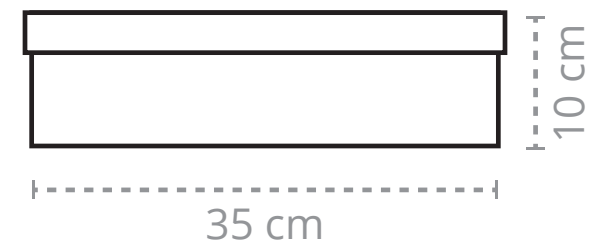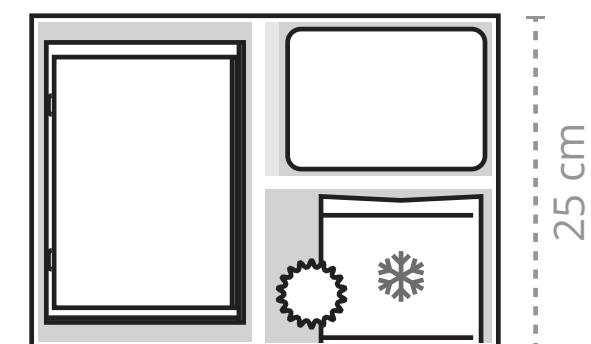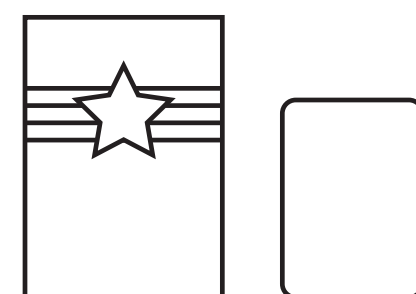

### BOX 1

Einführung  
Neurodermitis,  
Ernährung,  
Allergien

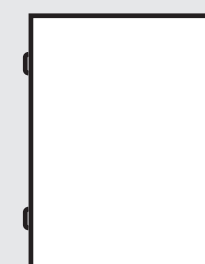

Broschüre

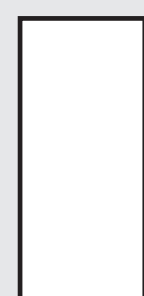

Folder „Umgang  
mit dem Kratzen“

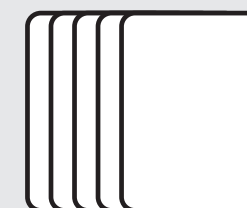

Karten

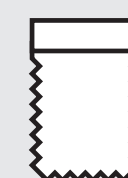

Stoffproben

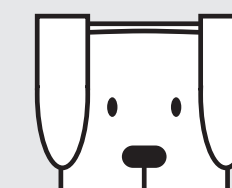

„Coolie“

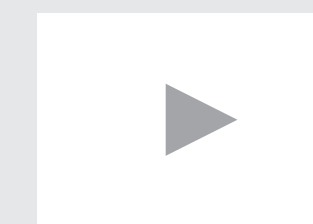

Film zur Broschüre

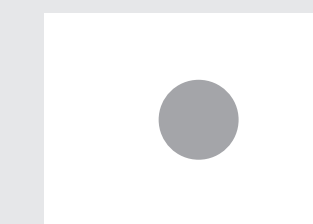

E-Learning  
„Warum juckt meine Haut?“

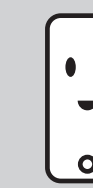

atopi App

### BOX 2

Hautpflege,  
Basistherapie,  
Häusliches  
Umfeld

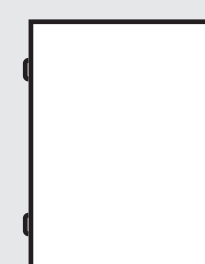

Broschüre

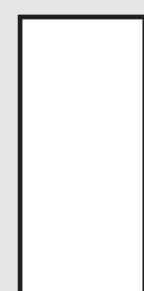

Folder „Umgang  
mit Belastungen“

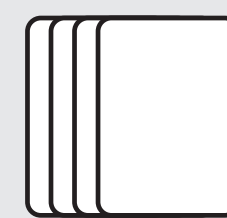

Karten

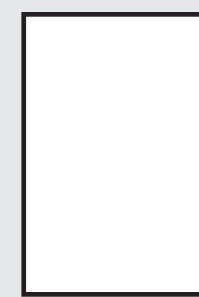

Tipps zum  
Eincremen

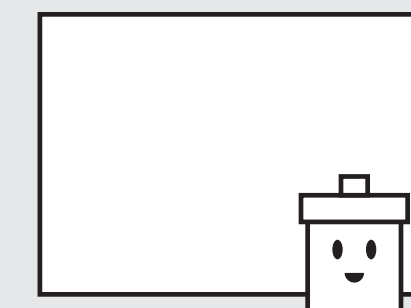

Kruke „Ungi“,  
Stufenplan 1

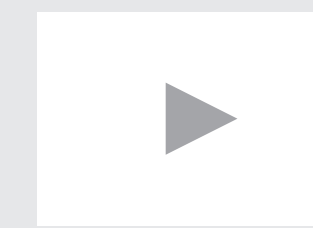

Film zur Broschüre

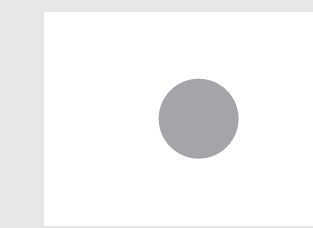

E-Learning  
Wirkfaktoren

### BOX 3

Regulation,  
Ernährung,  
Allergien

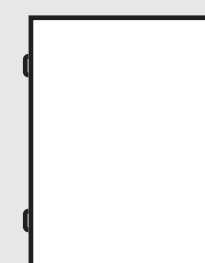

Broschüre

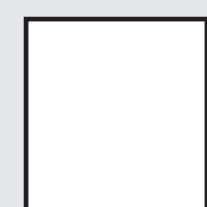

Mutmachbuch

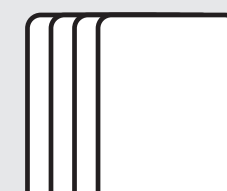

Karten

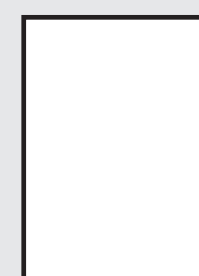

Tipps zur  
Reinigung  
der Haut

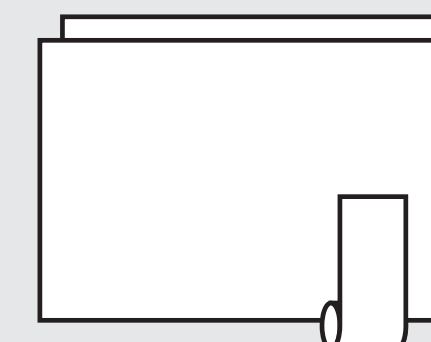

Verbandmaterial,  
Stufenplan 2 + 3

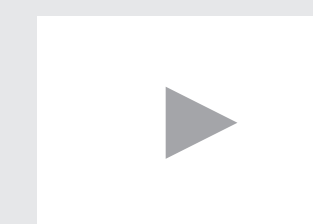

Film zur Broschüre

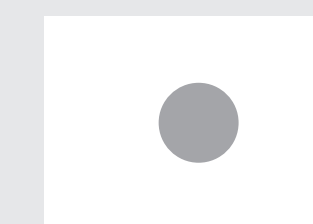

E-Learning  
Unverträglichkeiten

### BOX 4

Familie &  
Freunde

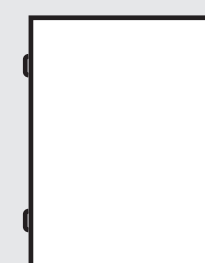

Broschüre

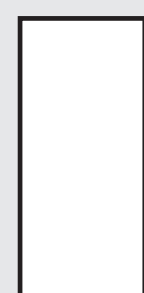

Folder  
„Selbstfürsorge“

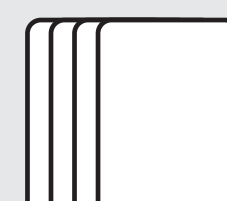

Karten

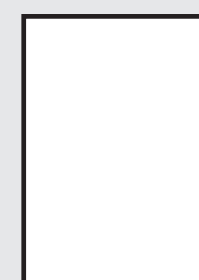

Symptom-  
tagebuch

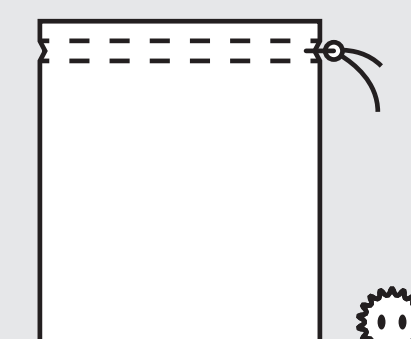

Igelball „Sparkle“,  
Beutel für Kratz-  
alternativen

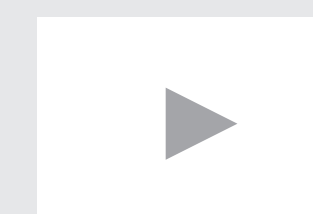

Film zur Broschüre

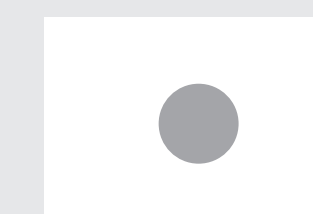

E-Learning  
„Was sage ich wann?“

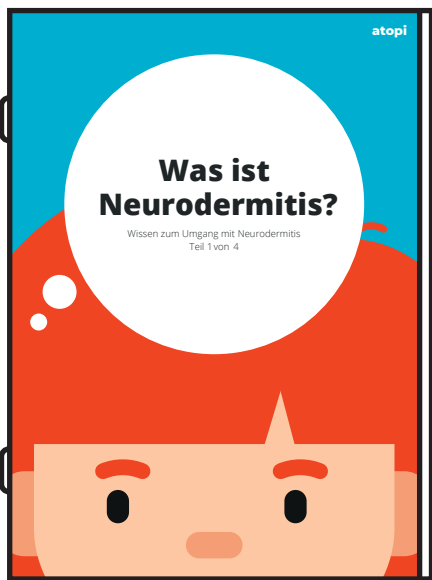

**Broschüre**  
Hauptsächliches Medium zur Wissensvermittlung

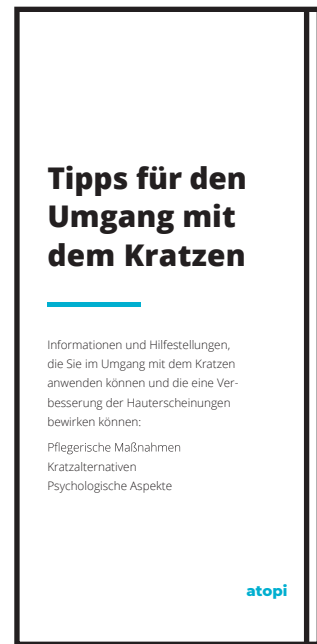

**Folder**  
Erklärung psychologischer Aspekte

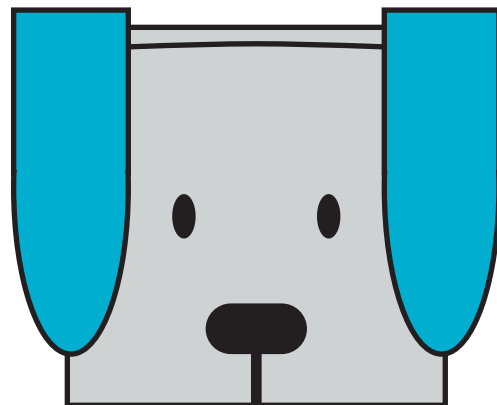

**Charakter mit Funktion**  
Zum Beispiel Kühlpad „Coolie“ als Kratzalternative

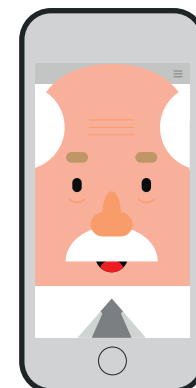

**App**  
Zur Dokumentation der Hauterscheinungen

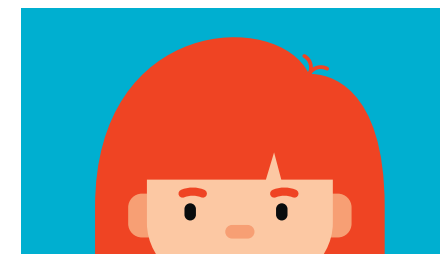

**Video**  
Weiteres Medium zur Wissensvermittlung

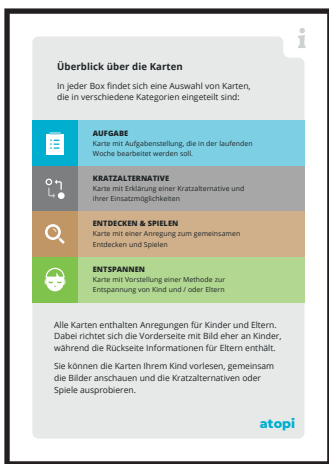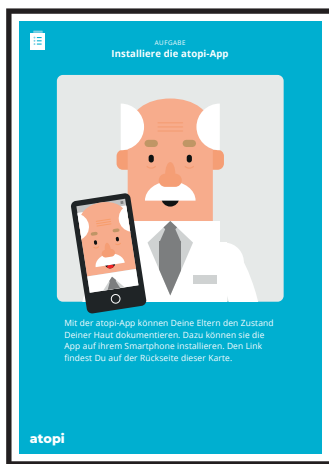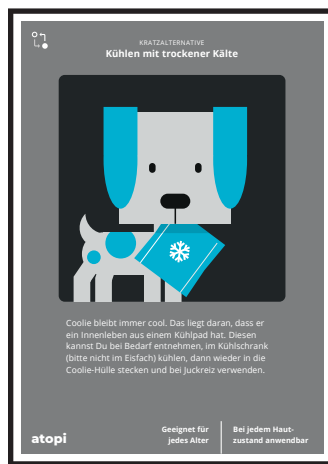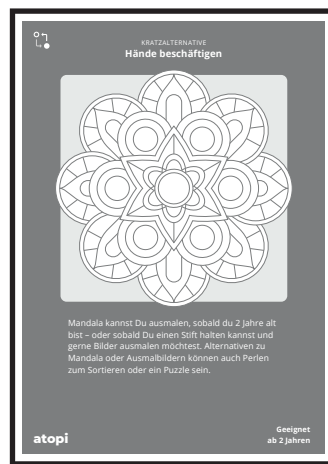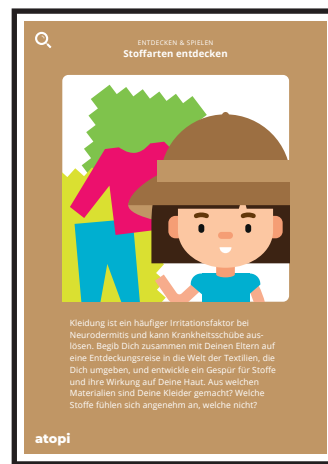

**Karten**  
Sammlung von Handlungsangeboten

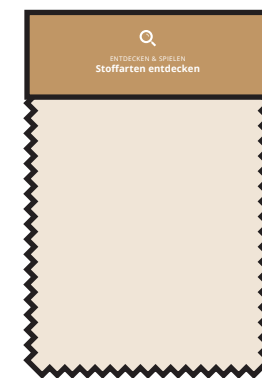

**Extras**  
Zusätzliches Material wie Stoffproben, Verband, ...

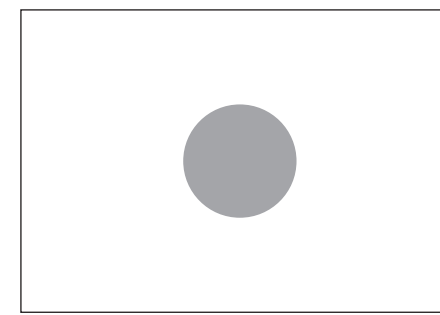

**E-Learning**  
Frage-Antwort-Übungen für den Alltag

### **Inhalte:**

- Fakten zu Neurodermitis
- Ernährung
- Allergien
- Kleidung
- Stressvermeidung / Entspannung  
(Autogenes Training, Jacobsen, ...)
- Kratzalternativen  
(Igelball, Mandala, Massage, ...)
- Selbstbewusstsein von Kind und Eltern stärken  
(nicht ansteckend, kein Fehler der Eltern ...)

### **PLUS**

- Dokumentation
- Tagebuch
- Selbstreflexion

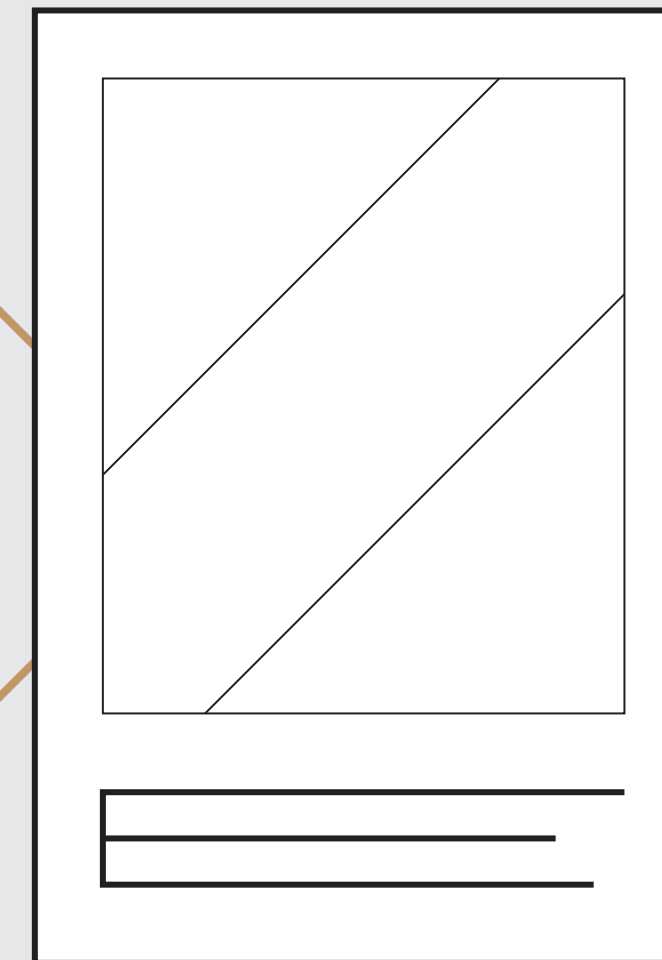

Geschichte,  
Spiel für  
Kinder

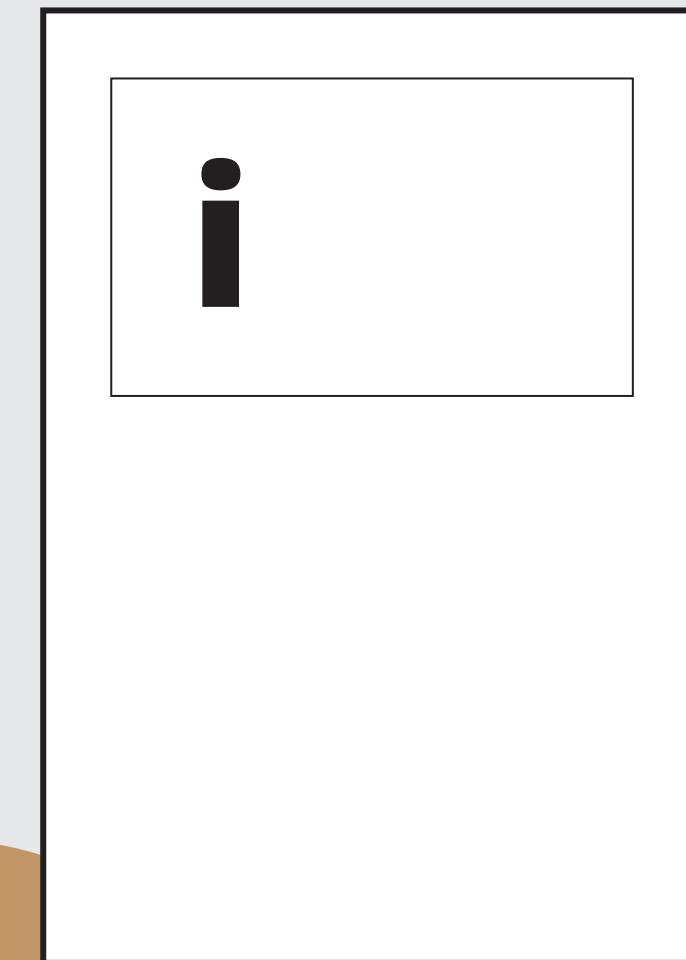

Informationen,  
Schulung für  
Eltern

**ZWEI SEITEN  
ERGÄNZEN  
SICH**

Die Ursachen für Neurodermitis sind vielfältig. Zum einen beruht sie auf einer **genetischen Veranlagung** (Atopie). Hierbei handelt es sich um eine komplexe Interaktion verschiedener Gene, bei der auch Genevarianten und (veränderte) Genfunktionen eine Rolle spielen. Als Folge tritt eine **gestörte Hautbarrierefunktion** auf. Daneben gibt es eine Vielzahl an möglichen Auslösern (**Triggerfaktoren**) für die Entzündung der Haut, die von Kind zu Kind unterschiedlich wichtig sind. Solche Auslöser können zum Beispiel sein: Schweiß, Infekte, eine Irritation der Haut durch bestimmte Kleidung, positiver oder negativer Stress, Allergien, Tabakrauch oder eine Besiedelung der Haut mit bestimmten Bakterien oder Keimen. Jedes Kind reagiert dabei individuell und nur auf einen Teil der Auslöser.

## WAS BEDEUTET ATOPIE?

„Atopie“ ist die medizinische Beschreibung für eine Bereitschaft, mit Überempfindlichkeitsreaktionen auf Substanzen aus der Umwelt zu reagieren. Zu den atopischen Erkrankungen zählen neben Neurodermitis auch allergischer Heuschnupfen und allergisches Asthma bronchiale. Geschätzt ist jeder Dritte ist Atopiker.

### Beispiele für Triggerfaktoren

Eine **atopische Veranlagung** lässt sich leider nicht beeinflussen. Beeinflussbar sind aber der Umgang mit den Auslösefaktoren und der Entzündung der Haut. Mit dem richtigen Wissen über Neurodermitis kann eine deutliche Besserung und Verbesserung der Lebensqualität erreicht werden.

Hausstaubmilben sind winzig, 400 der kleinen Milben passen auf einen Streichholzkopf

**Luftfeuchtigkeit:** höchstens 50% auf dem Hygrometer. Nicht frisch geduscht oder gebadet ins Bett gehen: das erhöht die Luftfeuchtigkeit.

Temperaturempfehlung im  
Schlafzimmer bei Tag und  
bei Nacht: 16 – 18° Celsius.

**Gepolsterte Möbel**  
möglichst aus glattem  
abwischbarem Material.

Offene Regale durch Spielkisten oder schließbare Schränke ersetzen.

Möglichst alle Staubfänger entfernen:  
Kuscheltiere möglichst aus glatten Materialien,  
und waschbar. Keine Fellteppiche, keine  
Unterlagen / Teppiche aus grob gewebtem  
Material, keine dicken Stoffvorhänge oder  
Textiltapete.

Kopfkissen und Bettdecke regelmäßig bei mindestens 60° waschen. Bevorzugt Kunstfaser-Bettdecken oder hochwertige, mit festen Nähten gut abgedichtete Federbetten verwenden.

Den Boden häufig feucht wischen oder einen Staubsauger mit hoher Saugkraft und Feinstaubfilter verwenden. Als Belag eignen sich am besten glatte Böden oder synthetische kurzflorige Teppichböden

Entkleiden und Haare kämmen im Schlafzimmer vermeiden, da sich Hausstaubmilben von abgehenden Hautschuppen (Mensch oder Tier) ernähren. Aus demselben Grund keine Haustiere ins Schlafzimmer lassen.

Morgens das Bettzeug gut auslüften.

Eine milbendichte Kompletthülle für Matratzen, ein sogenanntes Encasing, hat zwar nur einen mäßigen Effekt auf den Hautzustand bei Neurodermitis. Bei einer nachgewiesenen Hausstaubmilbenallergie kann die Hülle aber in Erwägung gezogen werden.

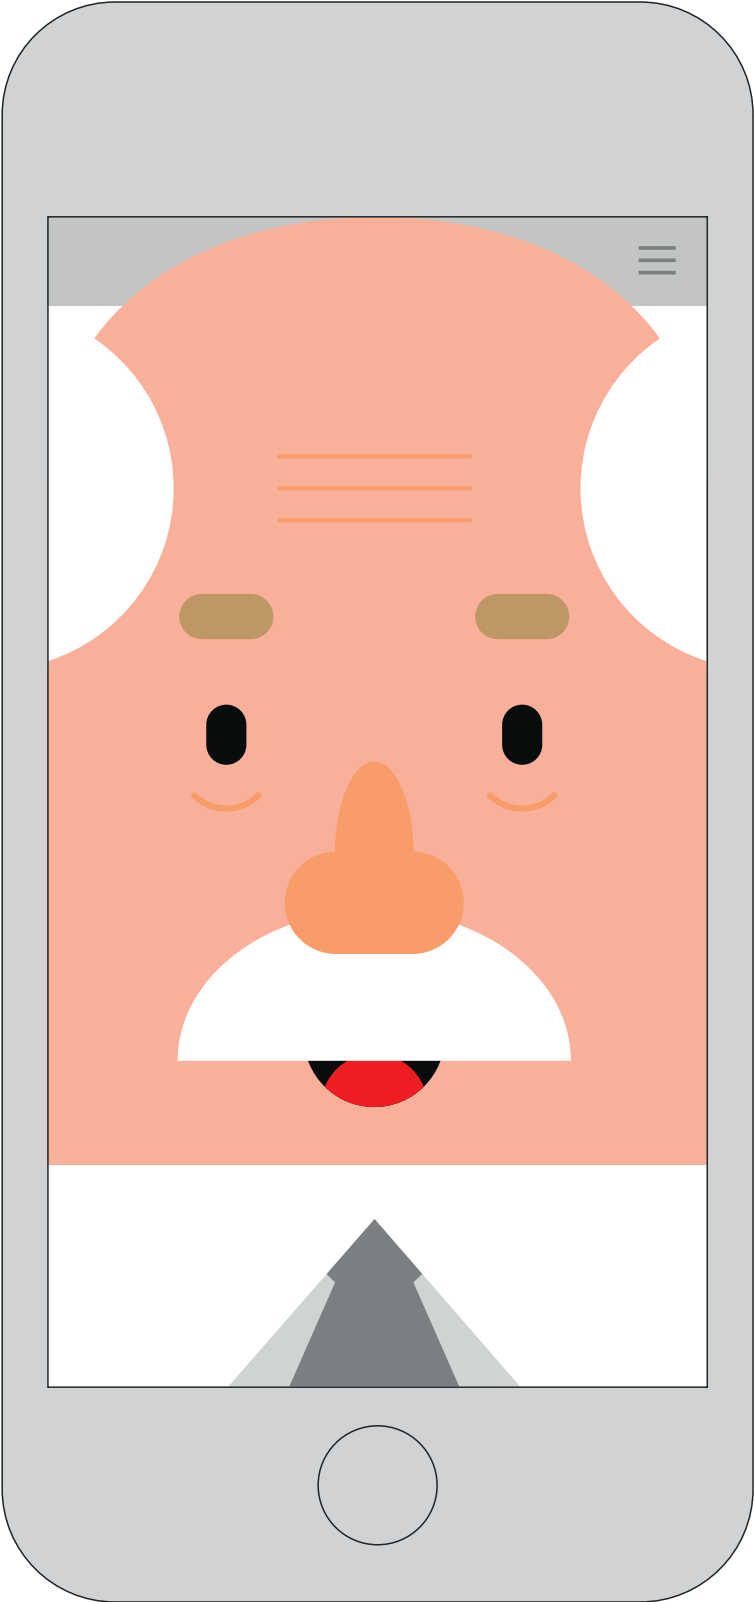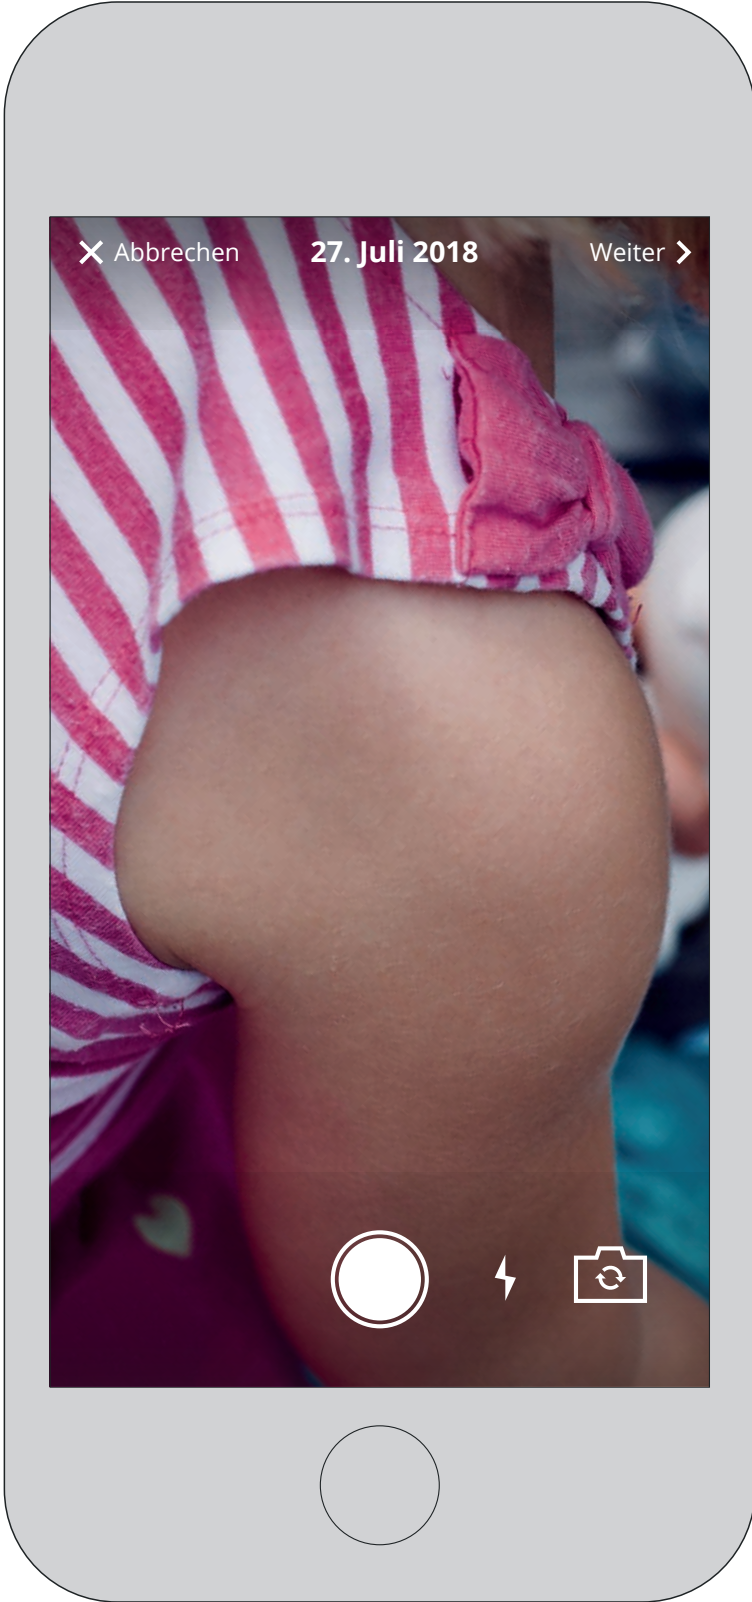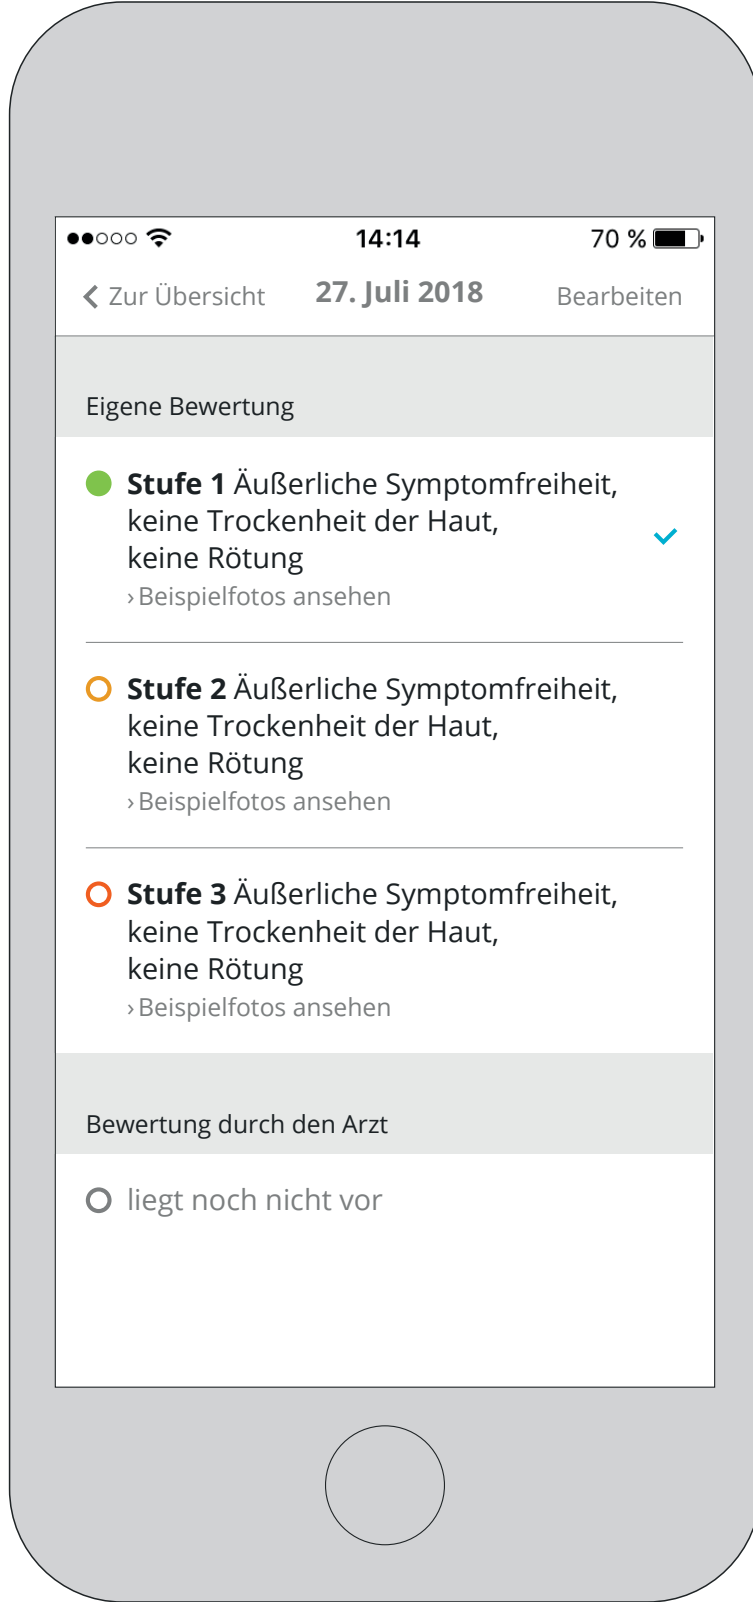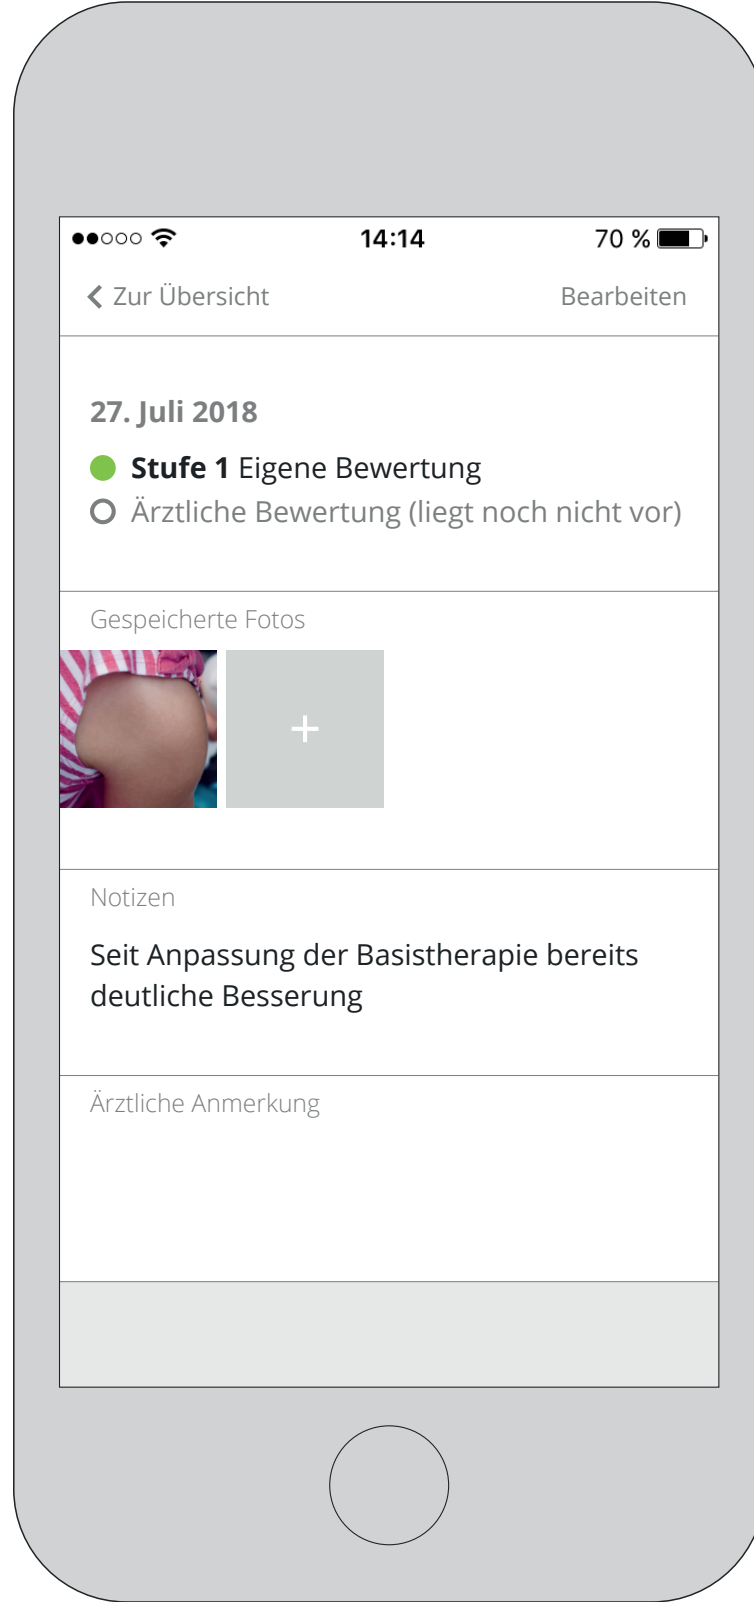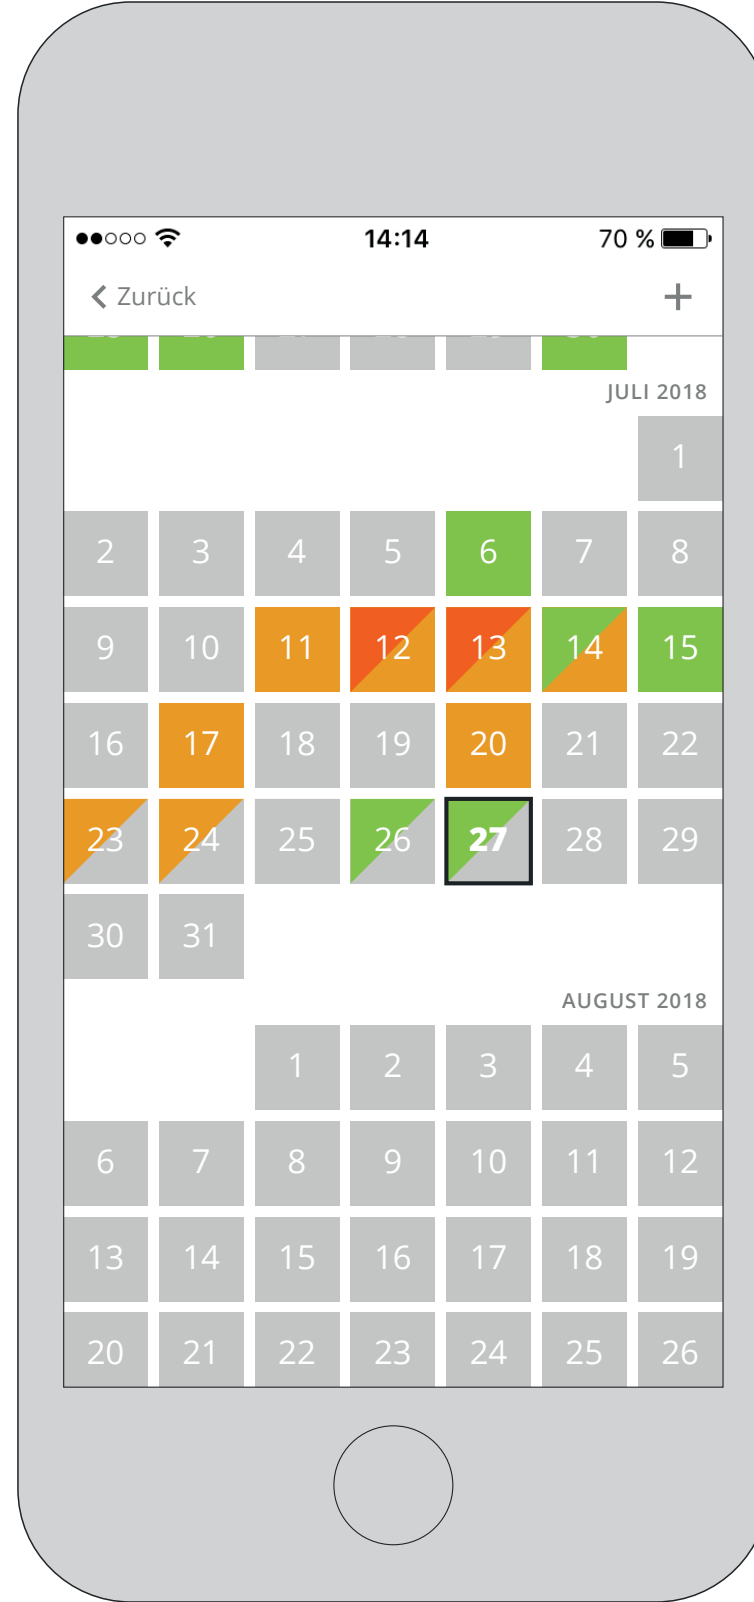

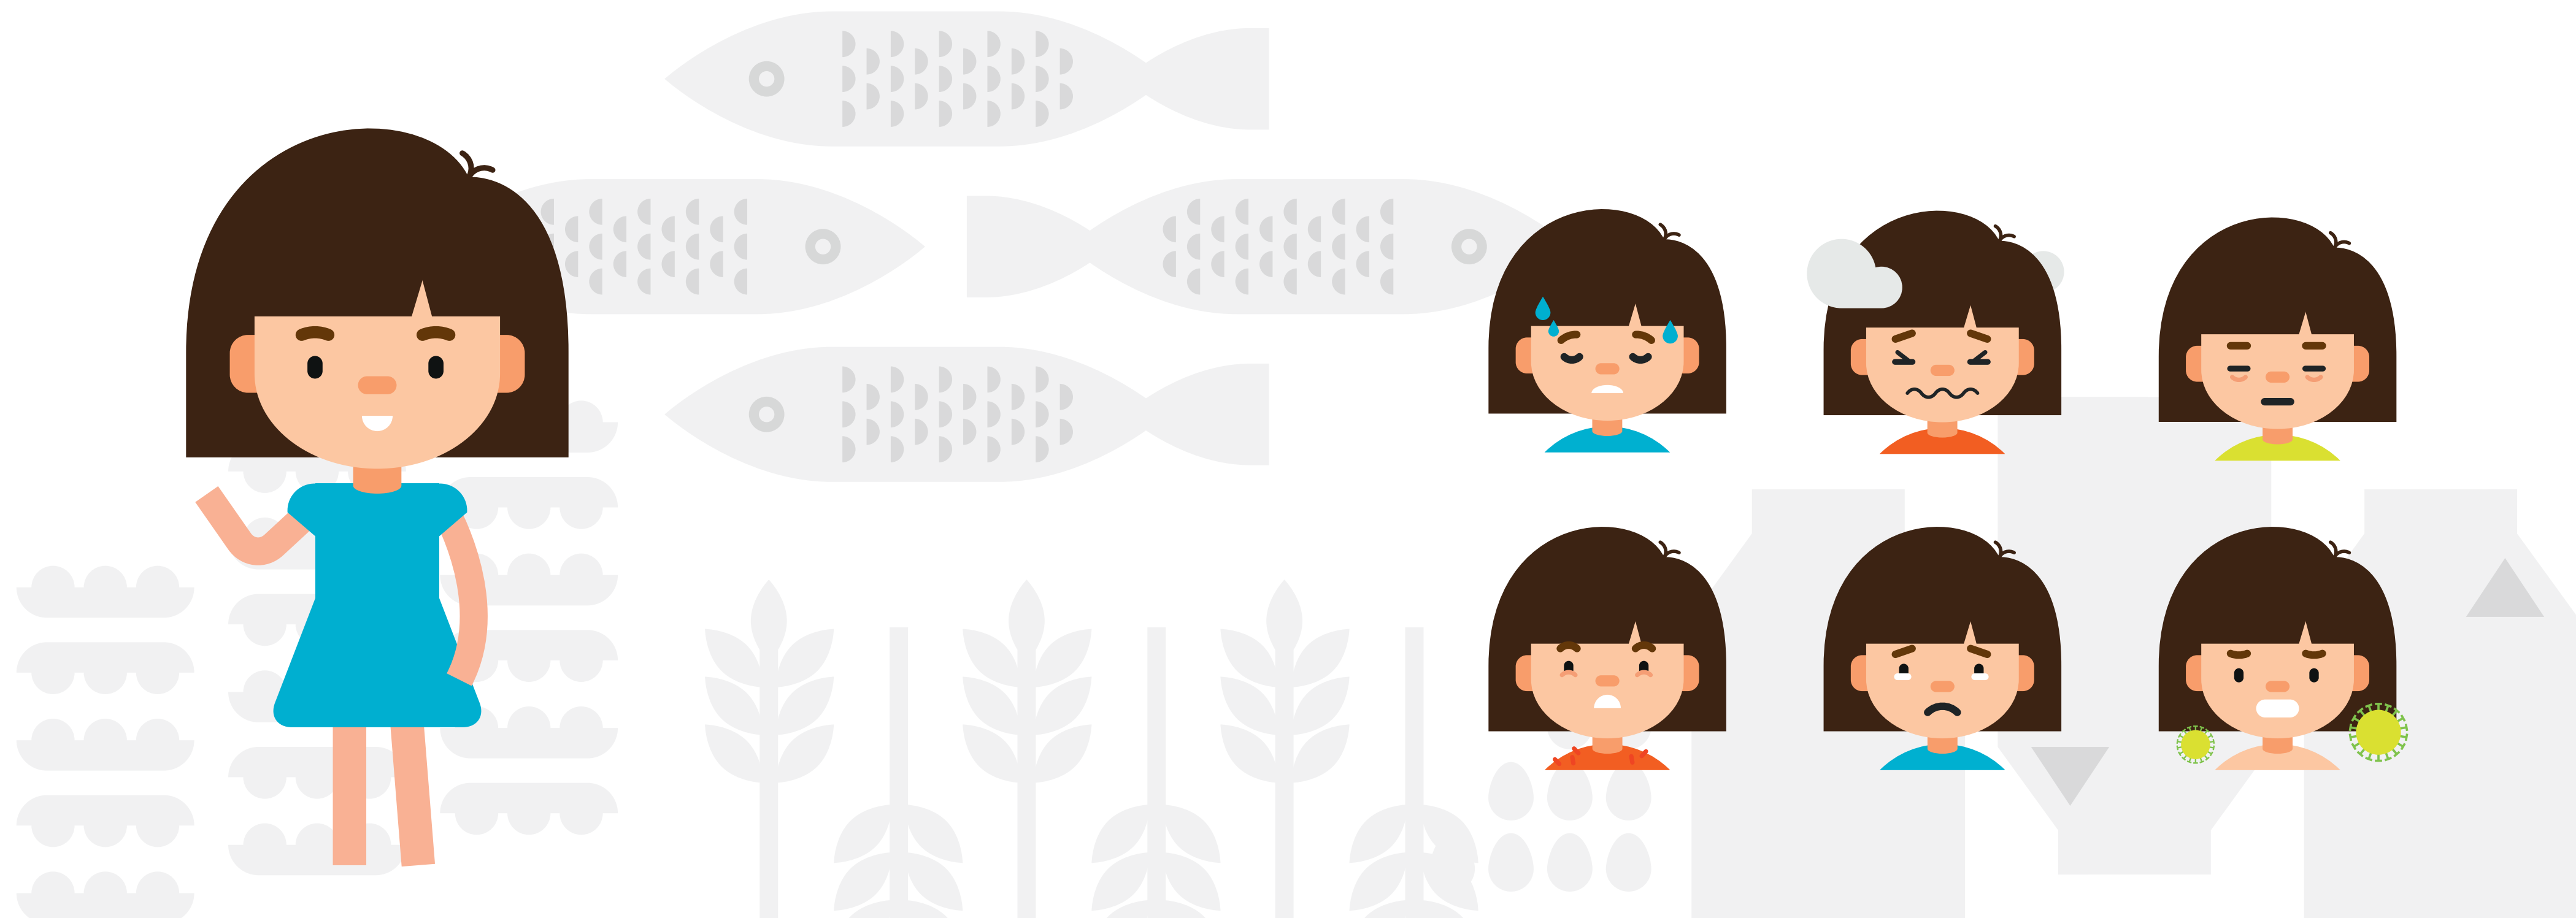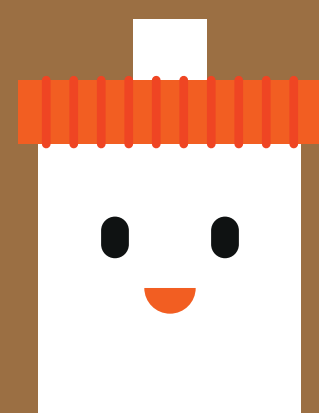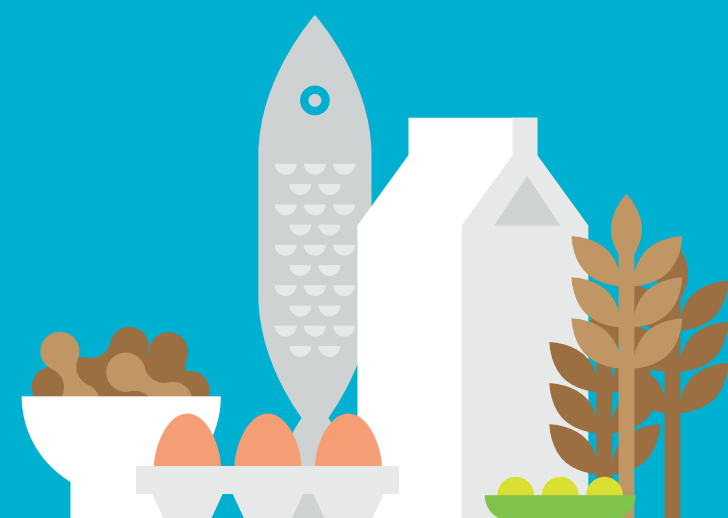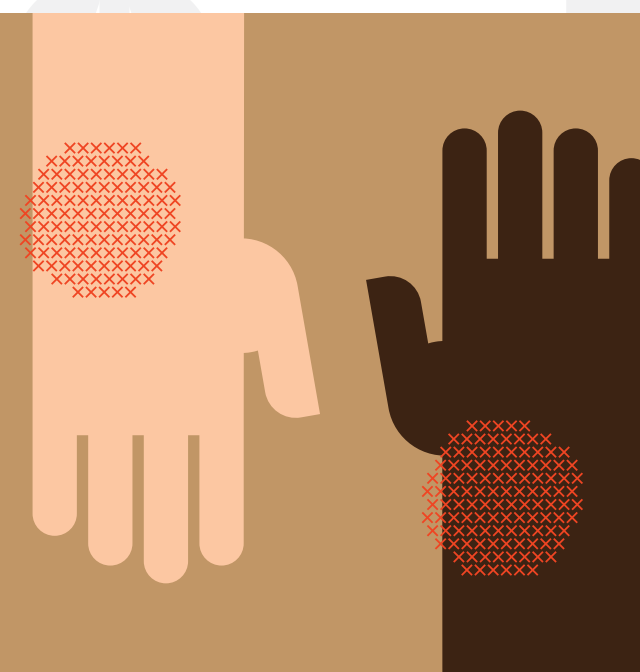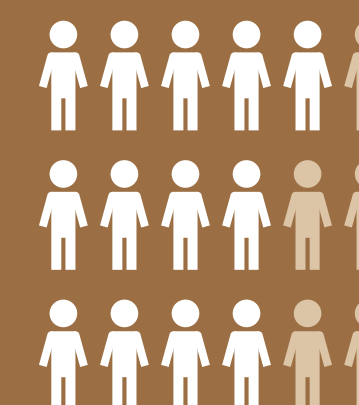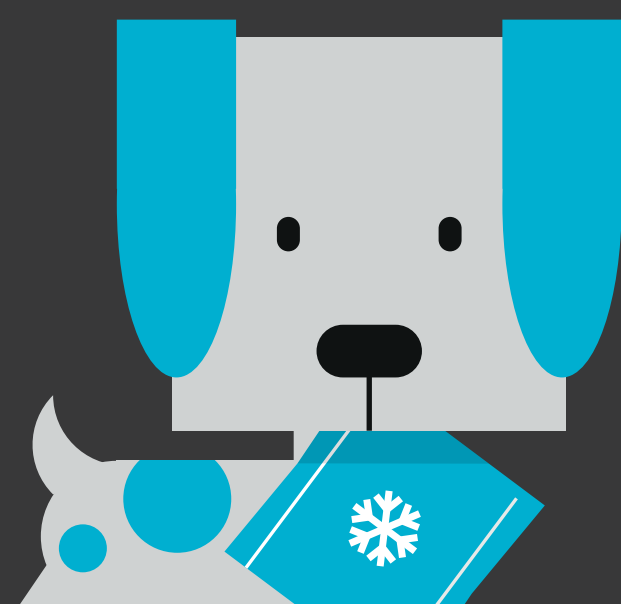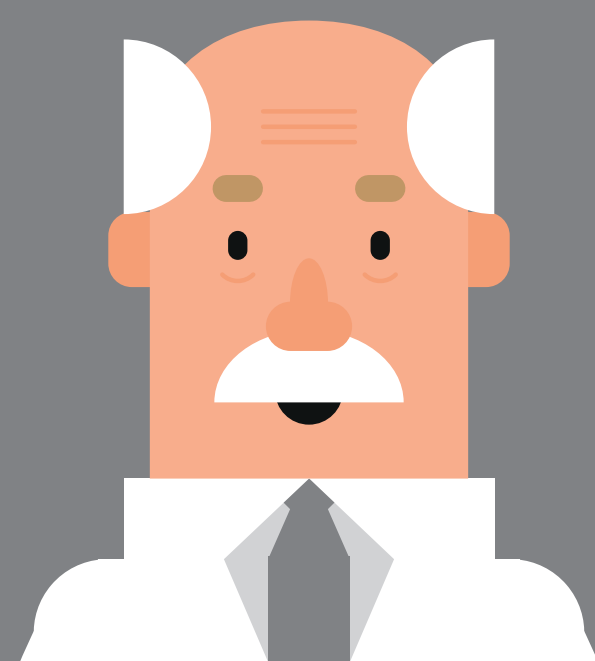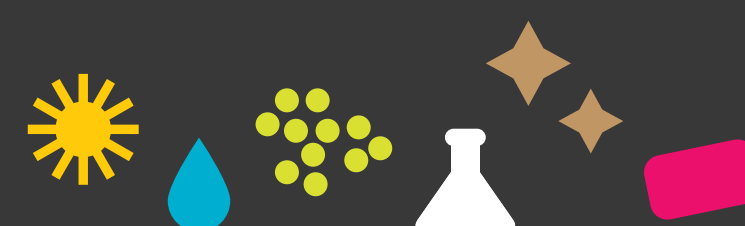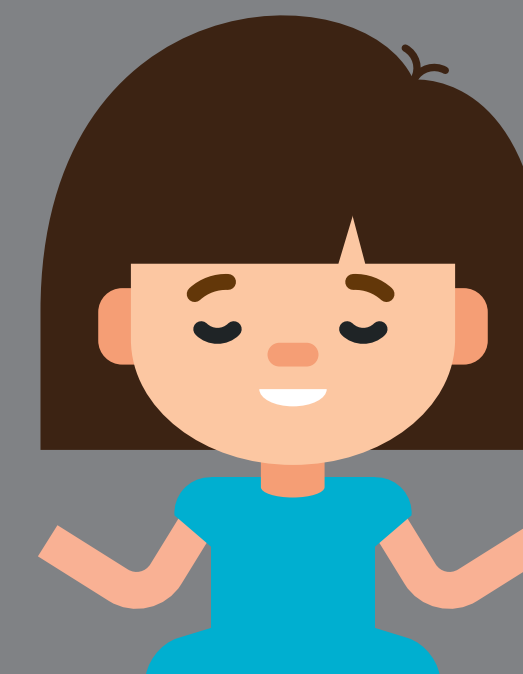

Supplement: s1 [file s1]
